# Supplementary material for: 12-O-tetradecanoylphorbol-13-acetate (TPA) increases murine intestinal crypt stem cell survival following radiation injury
Source: PubMed Central journal article supplement (PMC5542208; doi:10.18632/oncotarget.17269), 2017-04-20
Supplement: oncotarget-08-45566-s001.pdf [file oncotarget-08-45566-s001.pdf]

## 12-O-tetradecanoylphorbol-13-acetate (TPA) increases murine intestinal crypt stem cell survival following radiation injury

### SUPPLEMENTARY TABLE

Supplementary Table 1: Sequences of primers used in this study

|         |         |                                |
|---------|---------|--------------------------------|
| β-actin | forward | 5'-GGTGATCCACATCTGCTGGAA-3'    |
|         | reverse | 5'-ATCATTGCTCCTCCTCAGGG-3'     |
| Dclk1   | forward | 5'-CAGCAACCAGGAATGTATTGGA-3'   |
|         | reverse | 5'-CTCAACTCGGAATCGGAAGACT-3'   |
| Msi1    | forward | 5'-CAGTTTCGGACCTATCTCTGAGGT-3' |
|         | reverse | 5'-AAGGTGATGAAACCAAACCCCT-3'   |
| Notch1  | forward | 5'-CGGGTCCACCAGTTTGAATG-3'     |
|         | reverse | 5'-GTTGTATTGGTTCGGCACCAT-3'    |
| Lgr5    | forward | 5'-CAGTTTCGGACCTATCTCTGAGGT-3' |
|         | reverse | 5'-AAGGTGATGAAACCAAACCCCT-3'   |
| Bmi1    | forward | 5'-CGGGTCCACCAGTTTGAATG-3'     |
|         | reverse | 5'-GTTGTATTGGTTCGGCACCAT-3'    |
